# Supplementary material for: Tuning chain extender structure to prepare high-performance thermoplastic polyurethane elastomers
Source: Royal Society of Chemistry journal article supplement (doi:10.1039/c8ra02784f), 2018-01-01
Supplement: c8ra02784f1.pdf [file c8ra02784f1.pdf]

## Electronic Supplementary Information (ESI)

# Tuning Chain Extenders Structure to Prepare High-Performance Thermoplastic Polyurethane Elastomers

Wei Juan Xu<sup>a</sup>, Jian Jun Wang<sup>\*a</sup>, Shi Yu Zhang<sup>a</sup>, Jun Sun<sup>a</sup>, Chuan Xiang Qin<sup>a</sup>, Li Xing Dai<sup>a</sup>,  
and Jia Jia Chen<sup>b</sup>

<sup>a</sup> College of Chemistry, Chemical Engineering and Materials, Science of Soochow University, Suzhou 215123, China

<sup>b</sup> WestCHEM, School of Chemistry, the University of Glasgow, University Avenue, Glasgow G12 8QQ, Scotland (UK)

\*Corresponding author. E-mail: wangjianjun@suda.edu.cn (Jian Jun Wang); Tel: 13915538961.

### Table of contents:

1. Supplementary Table (Table S1)
2. Supplementary Figures (Fig. S1–S10)

## 1. Supplementary Table

**Table S1** Comparison of thermal stabilities and mechanical properties of BDO-PU, monoFc-PU, and bisFc-PU.

| Samples   | $T_{5\%}$<br>(°C) | $T_{\max}$<br>(°C) | $\bar{E}_a$<br>(KJ/mol) | Young's<br>modulus<br>(MPa) | Stress,<br>$\sigma_{\max}$ (MPa) | Strain,<br>$\epsilon_{\max}$ (%) | Toughness<br>(GJ m <sup>-3</sup> ) |
|-----------|-------------------|--------------------|-------------------------|-----------------------------|----------------------------------|----------------------------------|------------------------------------|
| BDO-PU    | 298               | 300                | 110.6                   | 7.3                         | 27.5                             | 932                              | 10.6                               |
| monoFc-PU | 321               | 350                | /                       | 6.0                         | 6.0                              | 758                              | 2.4                                |
| bisFc-PU  | 345               | 369                | 214.9                   | 13.9                        | 42.3                             | 1018                             | 19.6                               |

## 2. Supplementary Figures

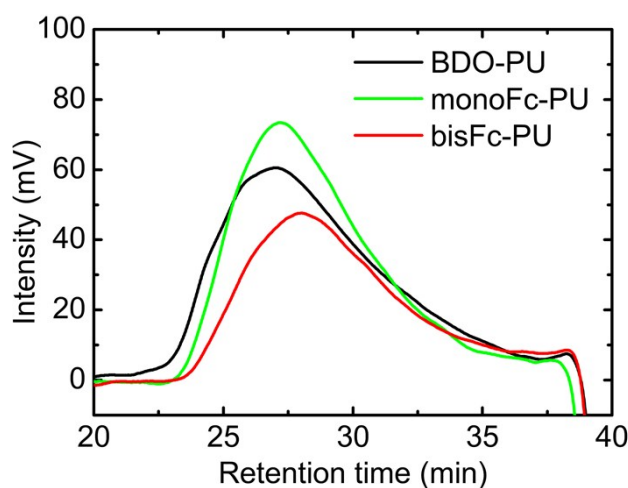

**Fig. S1** Gel permeation chromatograph curves of BDO-PU, monoFc-PU and bisFc-PU were performed on a Waters-1515 using DMF-*LiBr* as an eluent and polystyrene (PS) as standards, the sample concentration was 2 ~ 3 mg mL<sup>-1</sup>, and the flow rate was 0.800 mL min<sup>-1</sup> at 40 °C. The BDO-PU ( $M_n = 3.6 \times 10^4$  g/mol,  $M_w/M_n = 2.0$ ), monoFc-PU ( $M_n = 3.0 \times 10^4$  g/mol,  $M_w/M_n = 1.6$ ), and bisFc-PU ( $M_n = 2.9 \times 10^4$  g/mol,  $M_w/M_n = 1.5$ ).

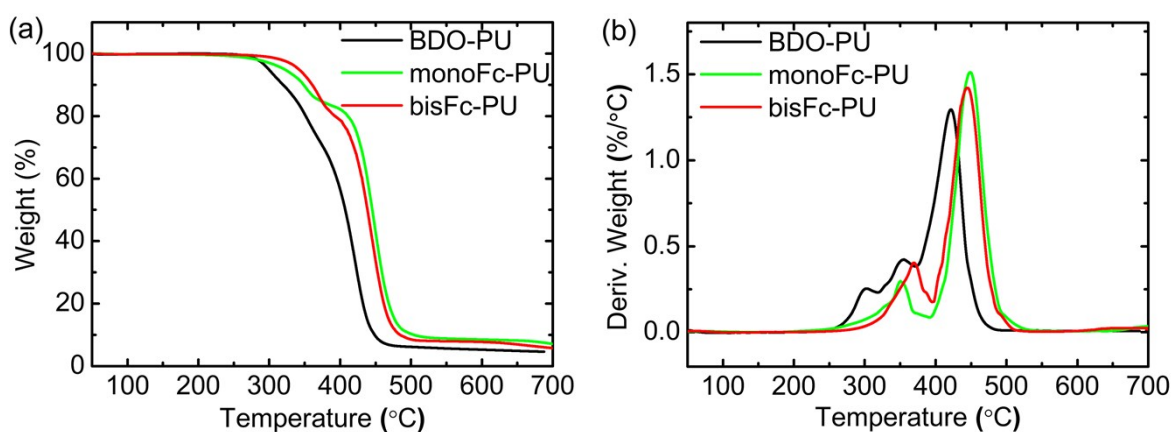

**Fig. S2** (a) TGA and (b) DTG thermograms of- BDO-PU, monoFc-PU and bisFc-PU, at the heating rate of  $10\text{ }^{\circ}\text{C min}^{-1}$  from 50 to 700  $^{\circ}\text{C}$  under nitrogen atmosphere.

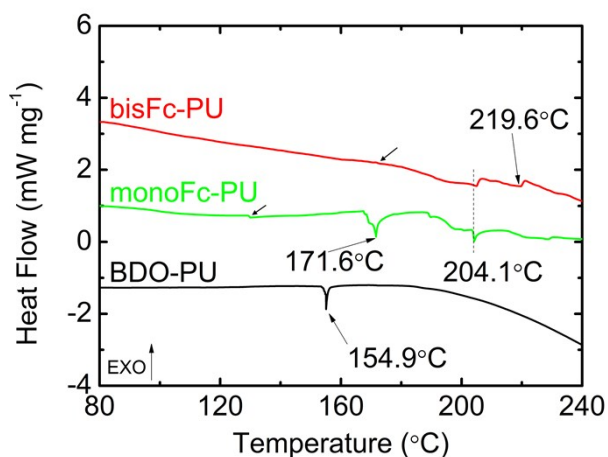

**Fig. S3** The thermal behaviors of hard segments for BDO-PU, monoFc-PU and bisFc-PU. The curves were derived from differential scanning calorimeter (DSC) of the second heating processes between 80 to 240  $^{\circ}\text{C}$ .

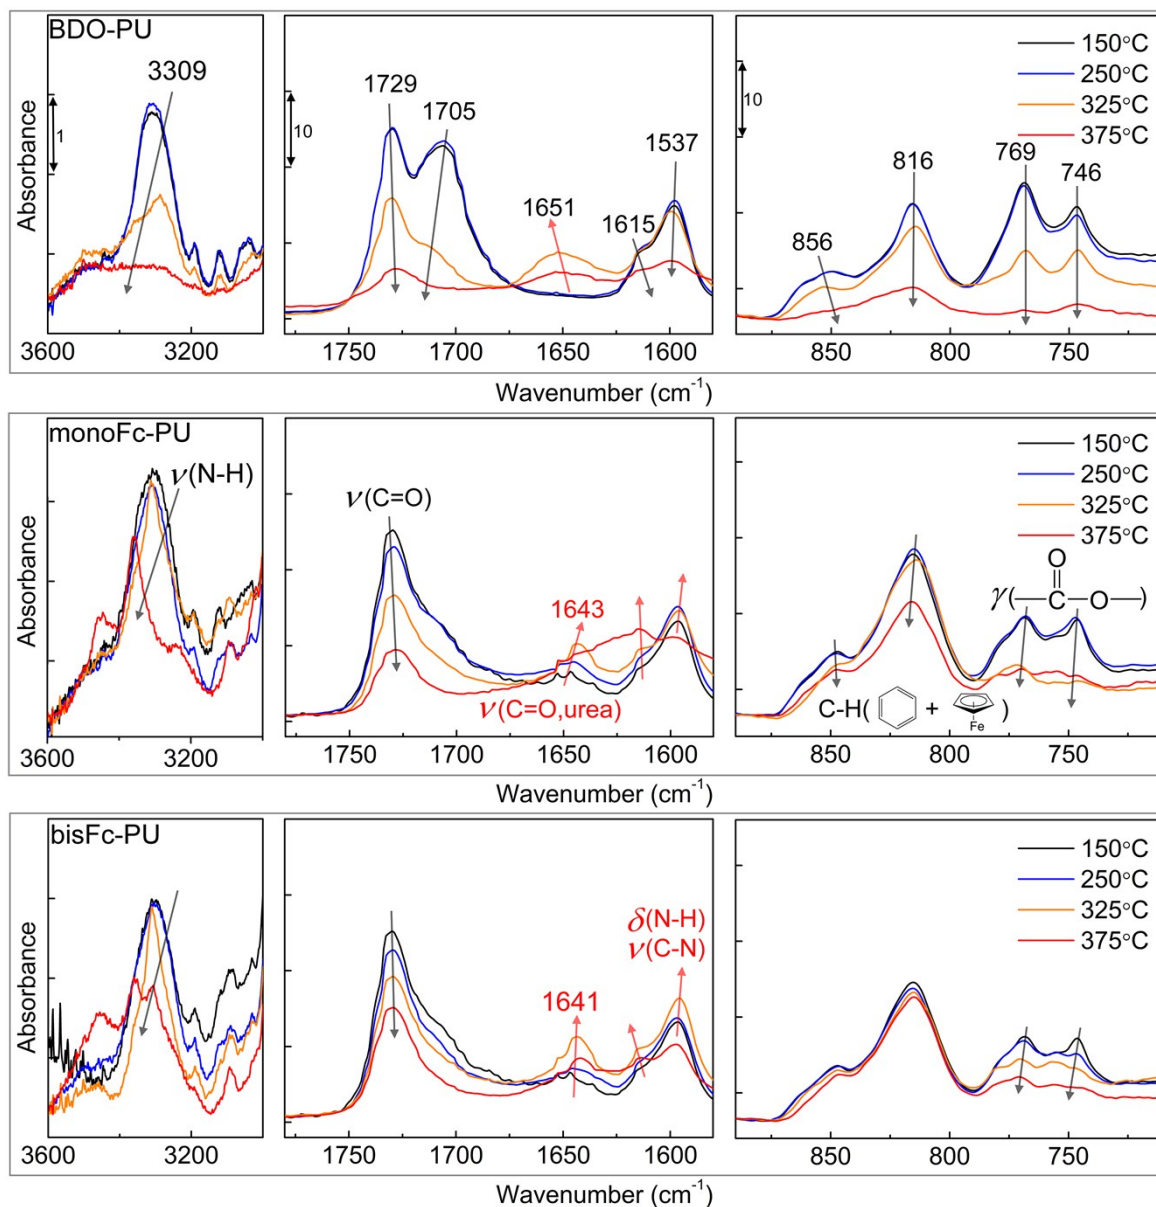

**Fig. S4** Fourier transform attenuated total reflection infrared spectroscopy (ATR-FTIR) spectra at various temperature (150, 250, 325, 375 °C) of BDO-PU, monoFc-PU and bisFc-PU at the region of 3600 – 3000  $\text{cm}^{-1}$ , 1780 - 1580  $\text{cm}^{-1}$  and 890 - 700  $\text{cm}^{-1}$ .

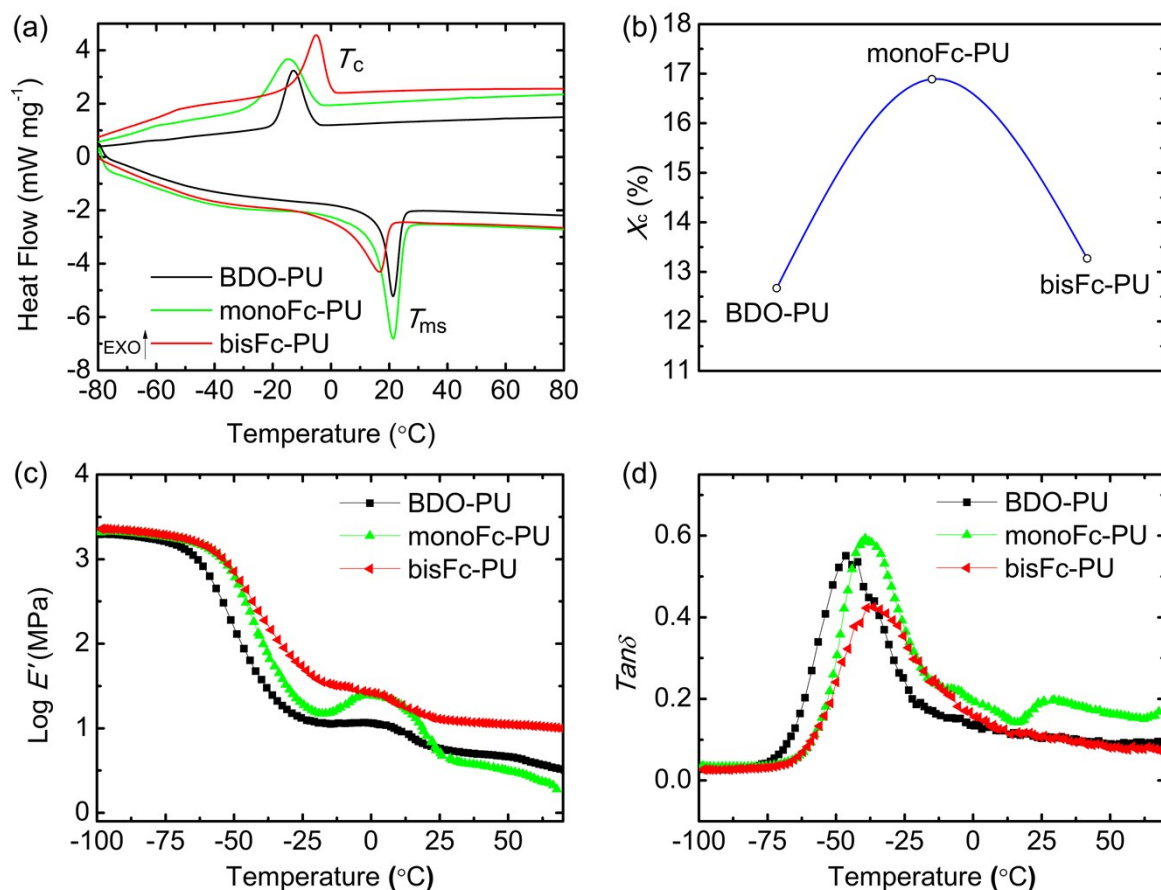

**Fig. S5** (a) Differential scanning calorimeter (DSC) curves of first cooling and second heating processes and (b) The crystallinity ( $X_c$ ) for BDO-PU, monoFc-PU and bisFc-PU; Dynamic mechanical analysis to show (c) the storage modulus and (d)  $\tan \delta$  of BDO-PU, monoFc-PU and bisFc-PU from at a heating rate at 3 °C min<sup>-1</sup> from -100 to 80 °C. The degree of crystallinity ( $X_c$ ) for those PUs were calculated via the equation of  $X_c = \Delta H / \Delta H_0$ , where  $\Delta H$  is the heat fusion of PUs and  $\Delta H_0$  is the enthalpy of fusion of the fully crystalline material of  $\Delta H_0 = 172.2 \text{ J g}^{-1}$ .<sup>31</sup>

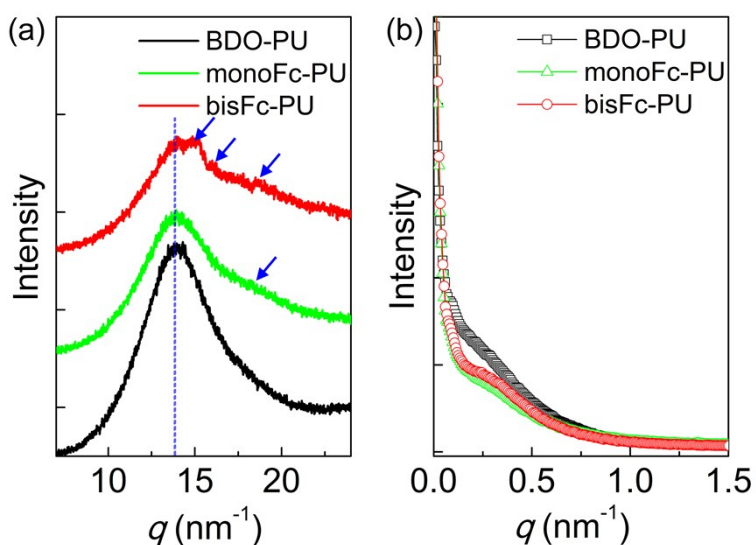

**Fig. S6** (a) WAXD and (b) SAXS profiles of BDO-PU, monoFc-PU and bisFc-PU.



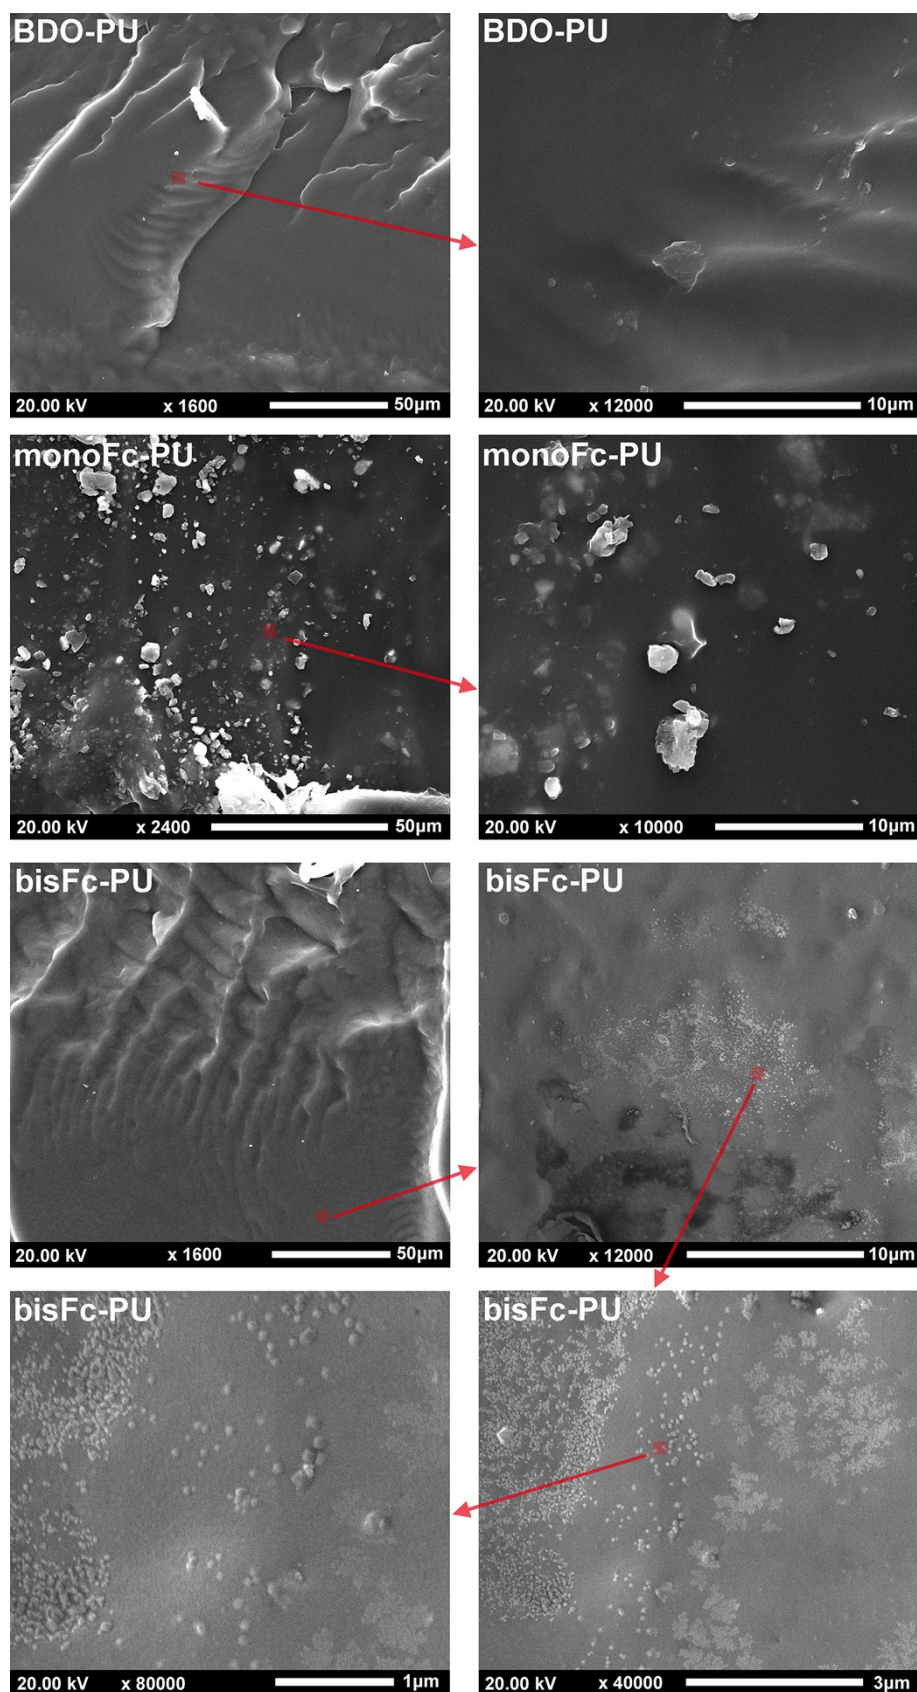

**Fig. S7** SEM images of BDO-PU, monoFc-PU and bisFc-PU, and partial enlargements of the marked positions.

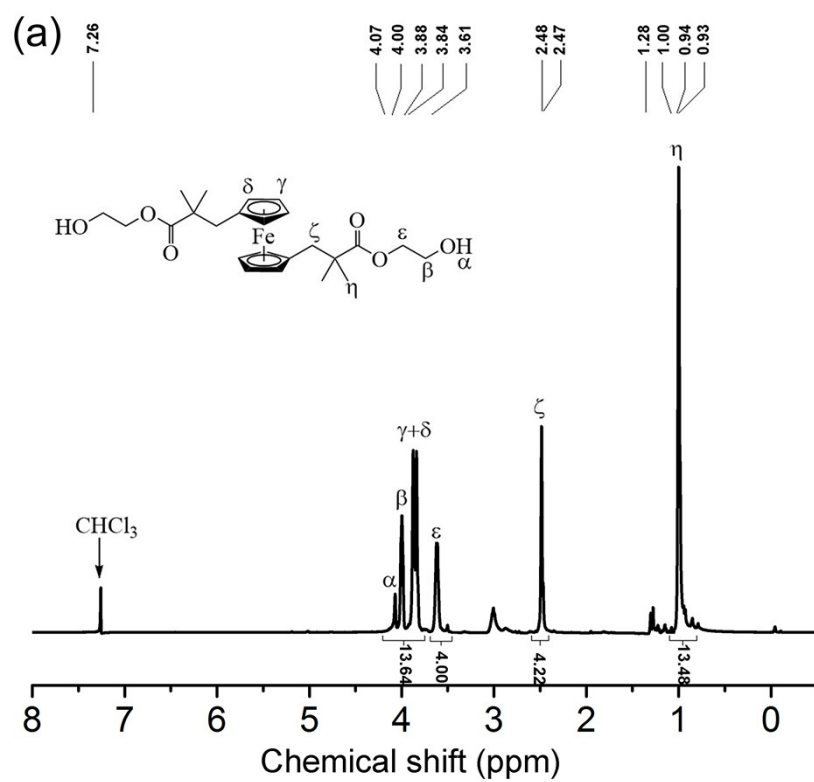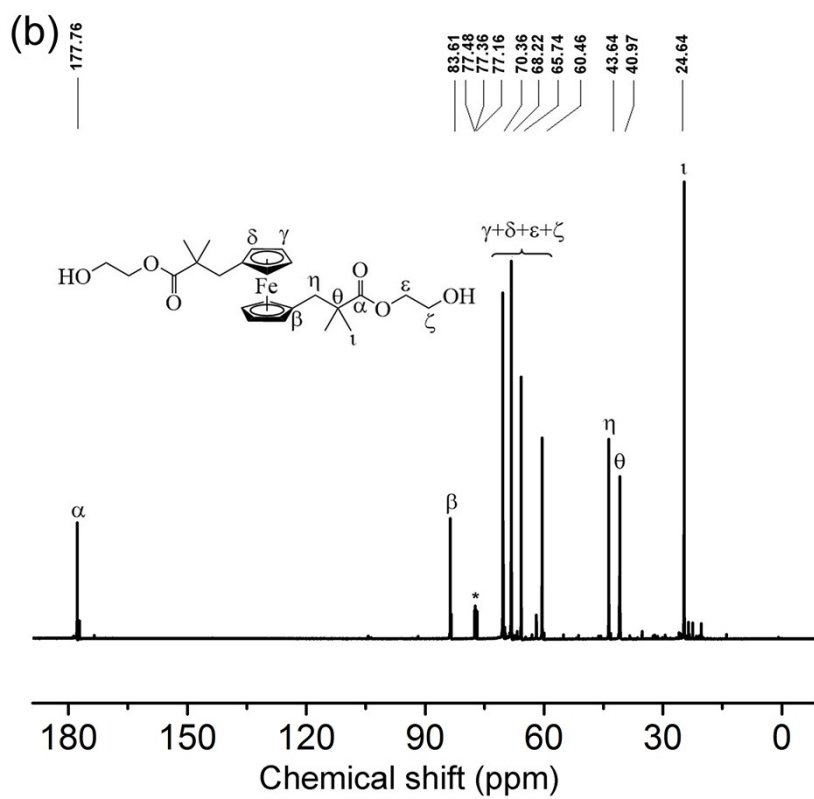

**Fig. S8** (a)  $^1\text{H}$ -NMR and (b)  $^{13}\text{C}$ -NMR spectra for monoFc (600 Hz,  $\text{CDCl}_3$ ).

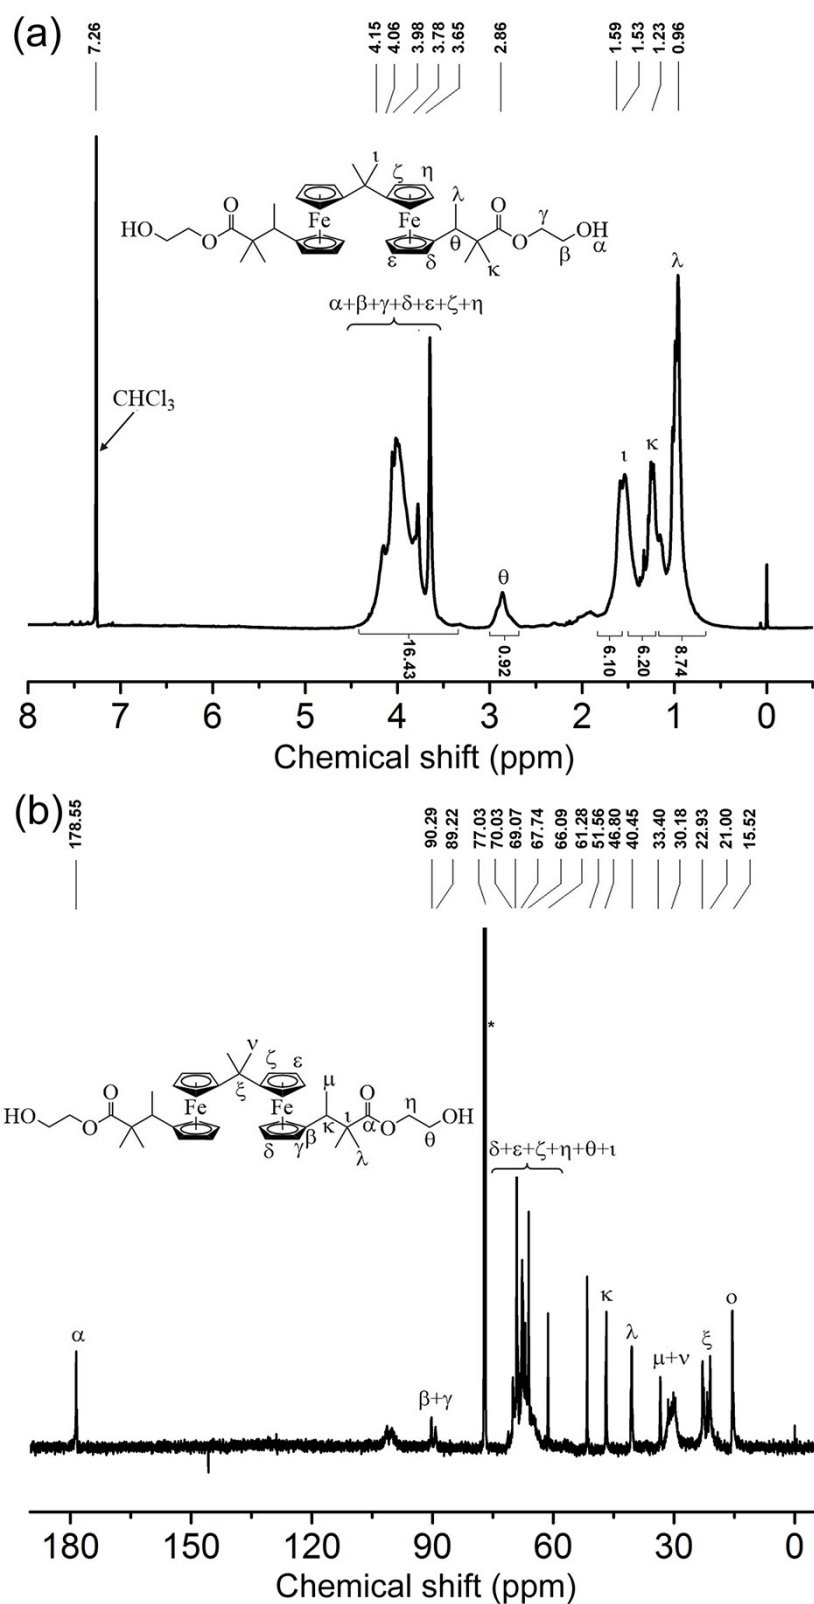

Fig. S9 (a) <sup>1</sup>H-NMR and (b) <sup>13</sup>C-NMR spectra for bisFc (600 Hz, CDCl<sub>3</sub>).



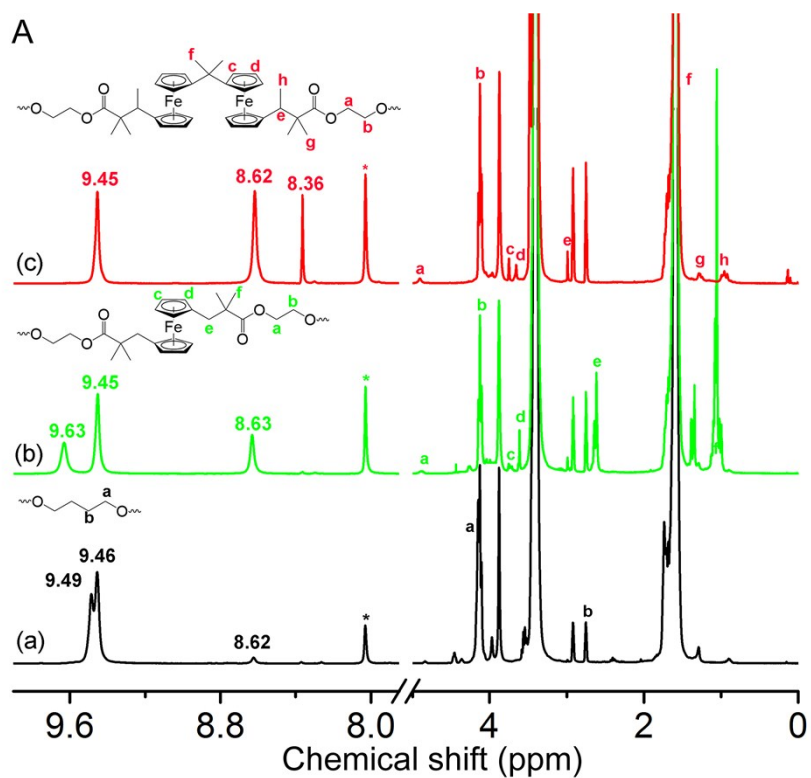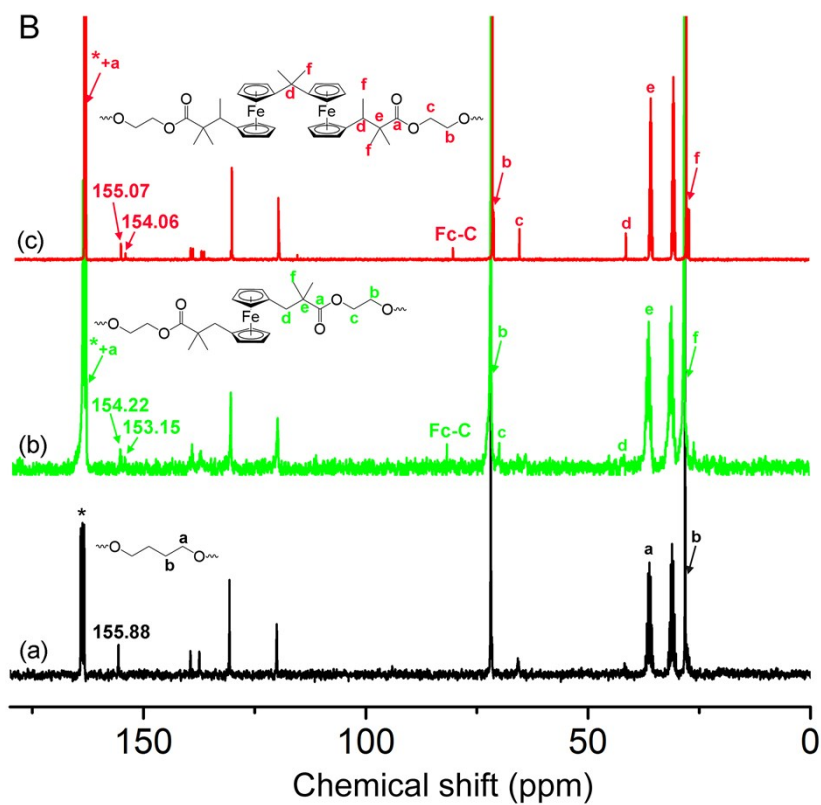

**Fig. S10** A)  $^1\text{H}$ -NMR and B)  $^{13}\text{C}$ -NMR spectra for (a) BDO-PU, (b) monoFc-PU, and (c) bisFc-PU (600 Hz,  $\text{DMF-}d_7$ ). (\*) Signals of solvent.
